# Supplementary material for: Magnetic dispersive micro-solid phase extraction with the CuO/ZnO@Fe3O4-CNTs nanocomposite sorbent for the rapid pre-concentration of chlorogenic acid in the medical extract of plants, food, and water samples
Source: Royal Society of Chemistry journal article supplement (doi:10.1039/c8an02484g), 2019-01-01
Supplement: c8an02484g1.pdf [file c8an02484g1.pdf]

1 **Electronic Supplementary Information**

---

2  
3 **Magnetic dispersive micro-solid phase extraction with CuO/ZnO@Fe<sub>3</sub>O<sub>4</sub>-**  
4 **CNTs nanocomposite sorbent for the rapid pre-concentration of**  
5 **chlorogenic acid in the medical extract of plants, food, and water samples**

6  
7  
8 Ebrahim Alipanahpour Dil <sup>a</sup>, Arash Asfaram \* <sup>b</sup> and Fardin Sadeghfar <sup>a</sup>

9  
10 <sup>a</sup> *Department of Chemistry, Yasouj University, Yasouj 75918-74831, Iran.*

11 <sup>b</sup> *Medicinal Plants Research Center, Yasuj University of Medical Sciences, Yasuj, Iran.*

---

---

\* Corresponding author: E-mail address:  
[arash.asfaram@yums.ac.ir](mailto:arash.asfaram@yums.ac.ir) (A. Asfaram)

12 **Contents**

13 **1. Figures**

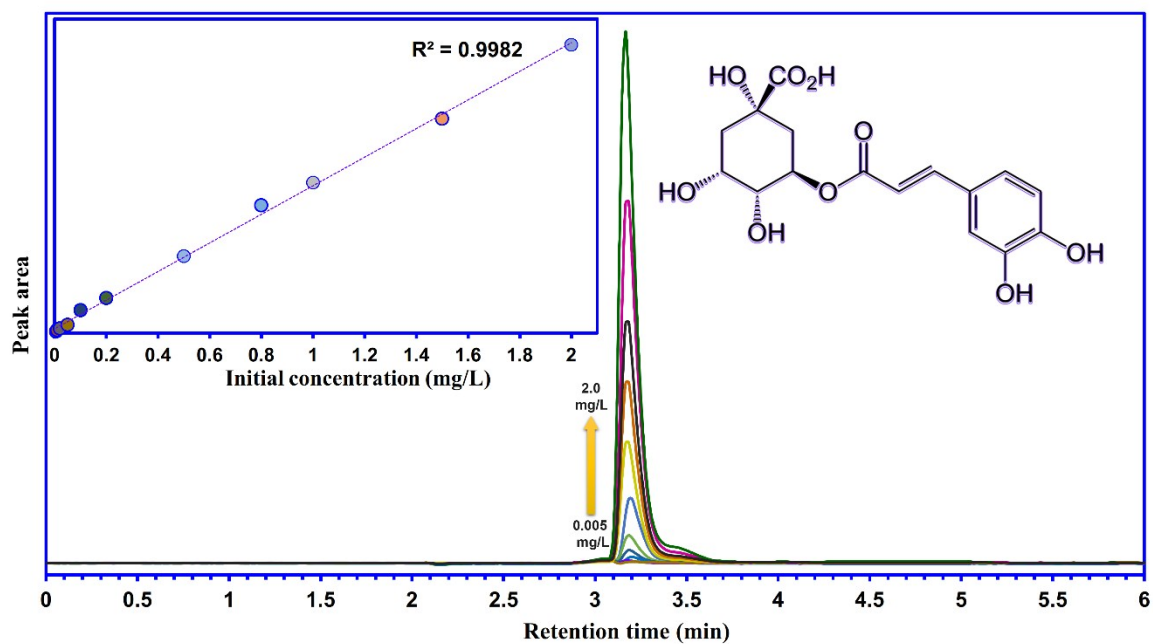

14

15 **Fig. S1.** Calibration curves of chlorogenic acid at different concentrations and the chemical  
16 structure.

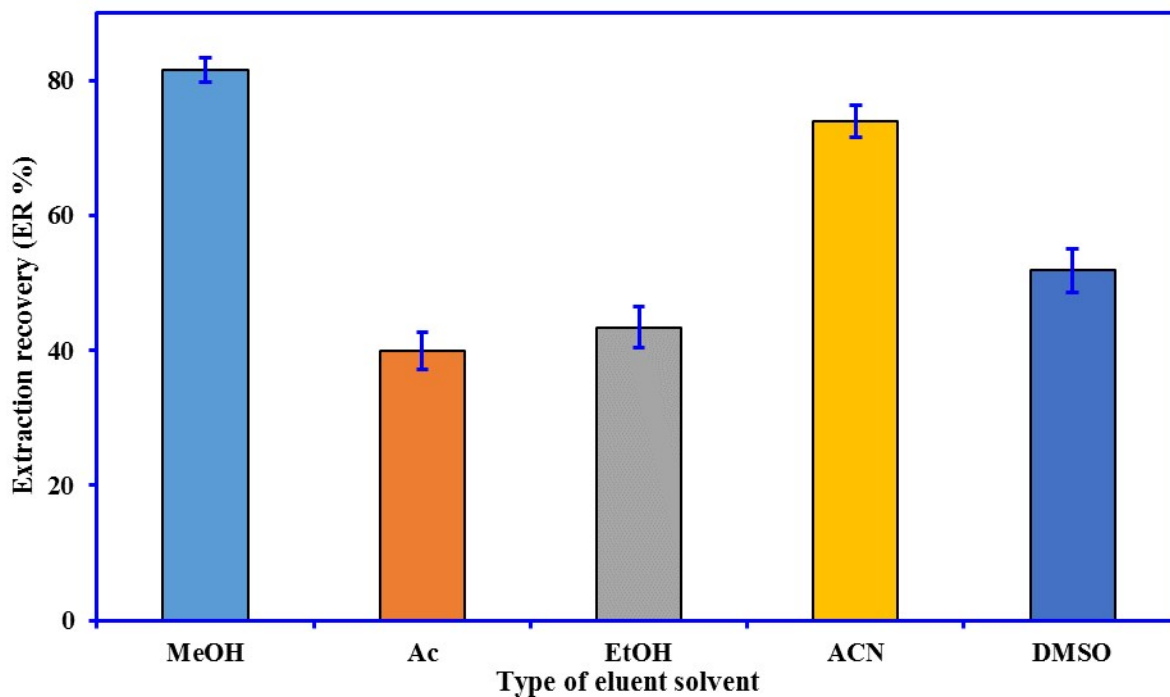

17

18 **Fig. S2.** Effect of the elution solvent on the extraction of the chlorogenic acid from water  
19 samples (N=3). Extraction conditions: 15 mL of water, pH 6.0 spiked at 200 ng mL<sup>-1</sup> of  
20 analyte, 10 mg of CuO/ZnO@Fe<sub>3</sub>O<sub>4</sub>-CNTs-NC, and 200 μL of each eluent.

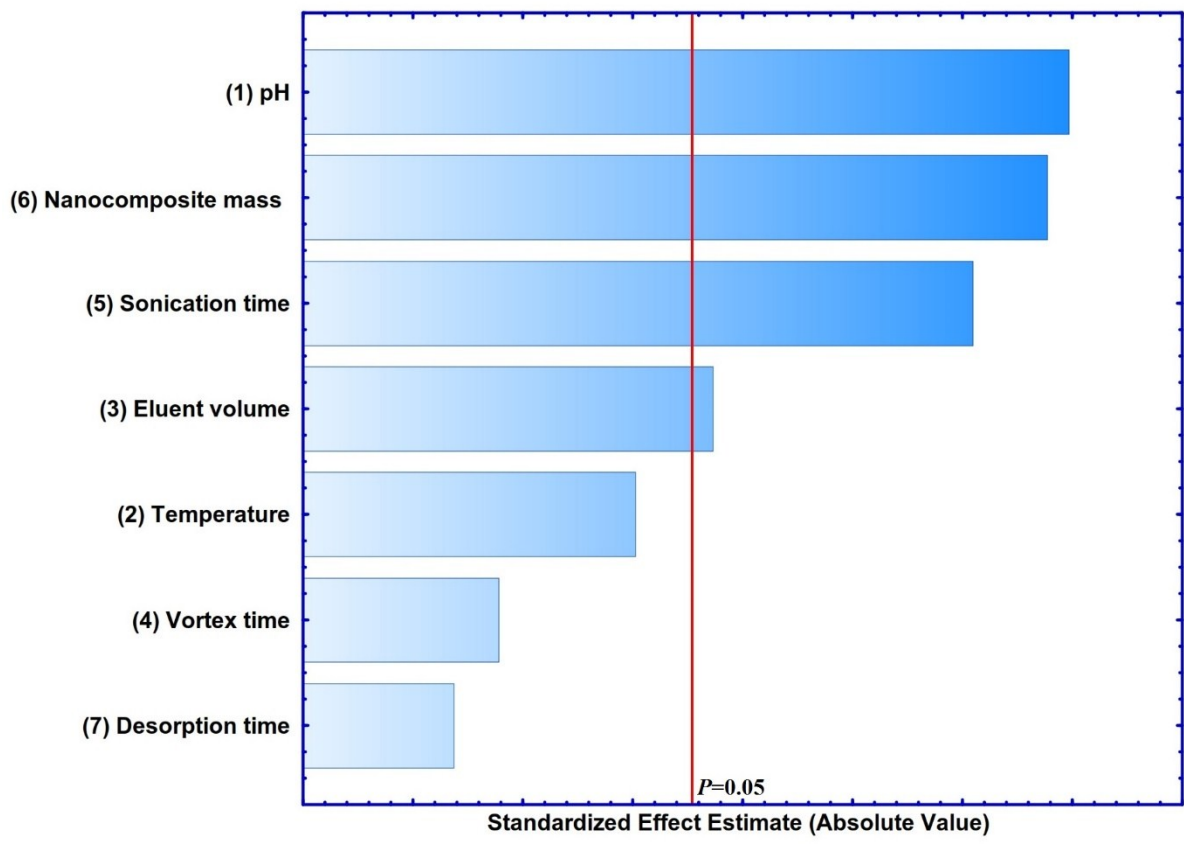

21

22 **Fig. S3.** Standardized main effect Pareto chart for the Plackett–Burman design. Vertical line  
 23 in the chart defines the 95% confidence level.

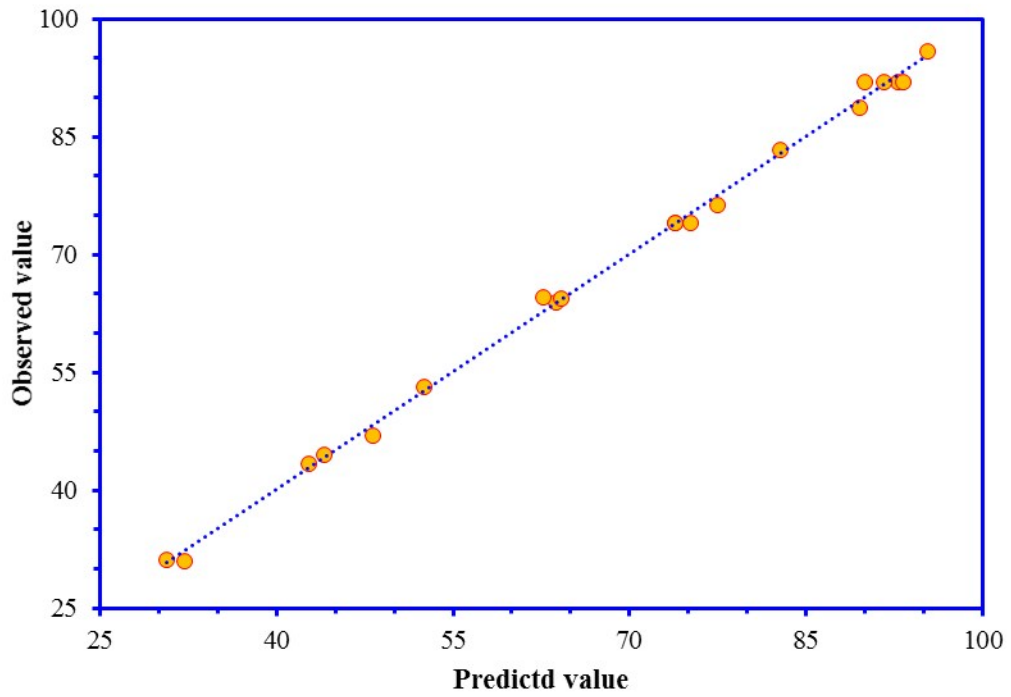

24

25 **Fig. S4.** Correlation of experimental with predicted values of ER% of chlorogenic acid.

26

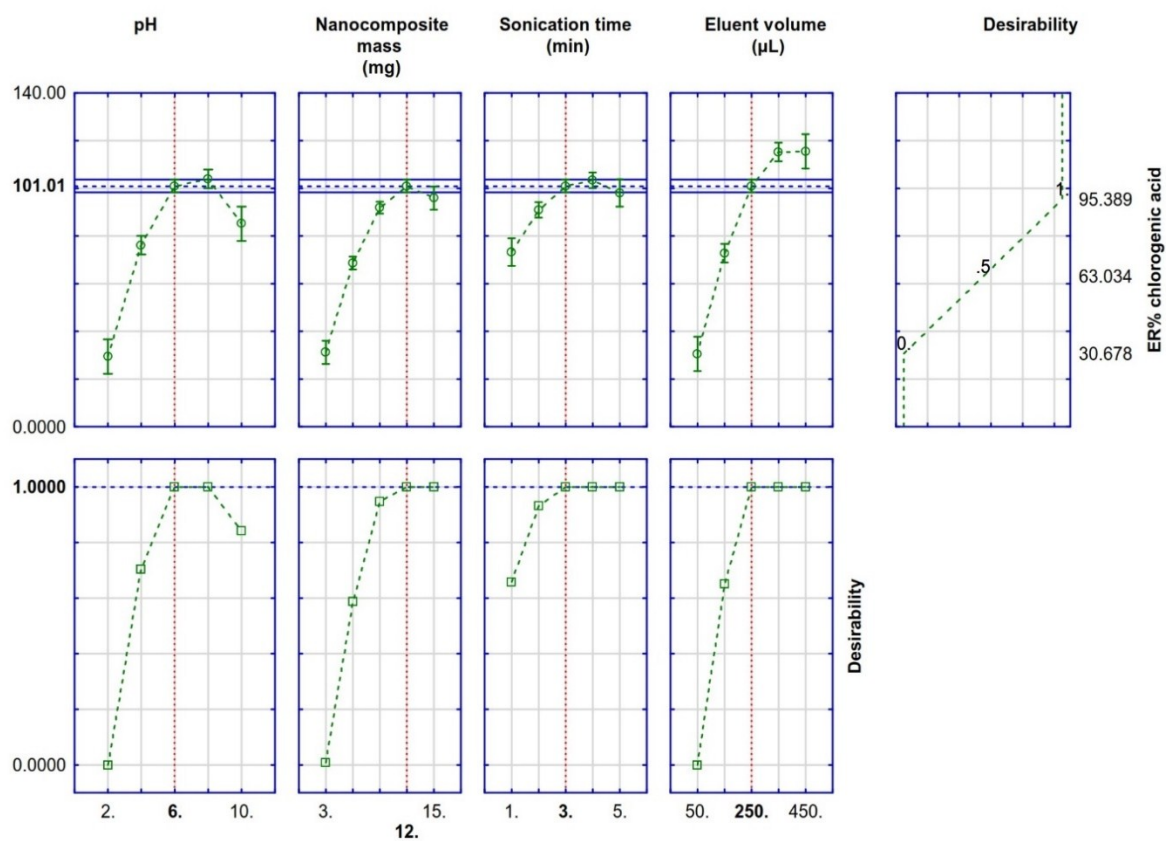

**Fig. S5.** The conditions of profile optimum by the CCD design for the recovery of chlorogenic acid.

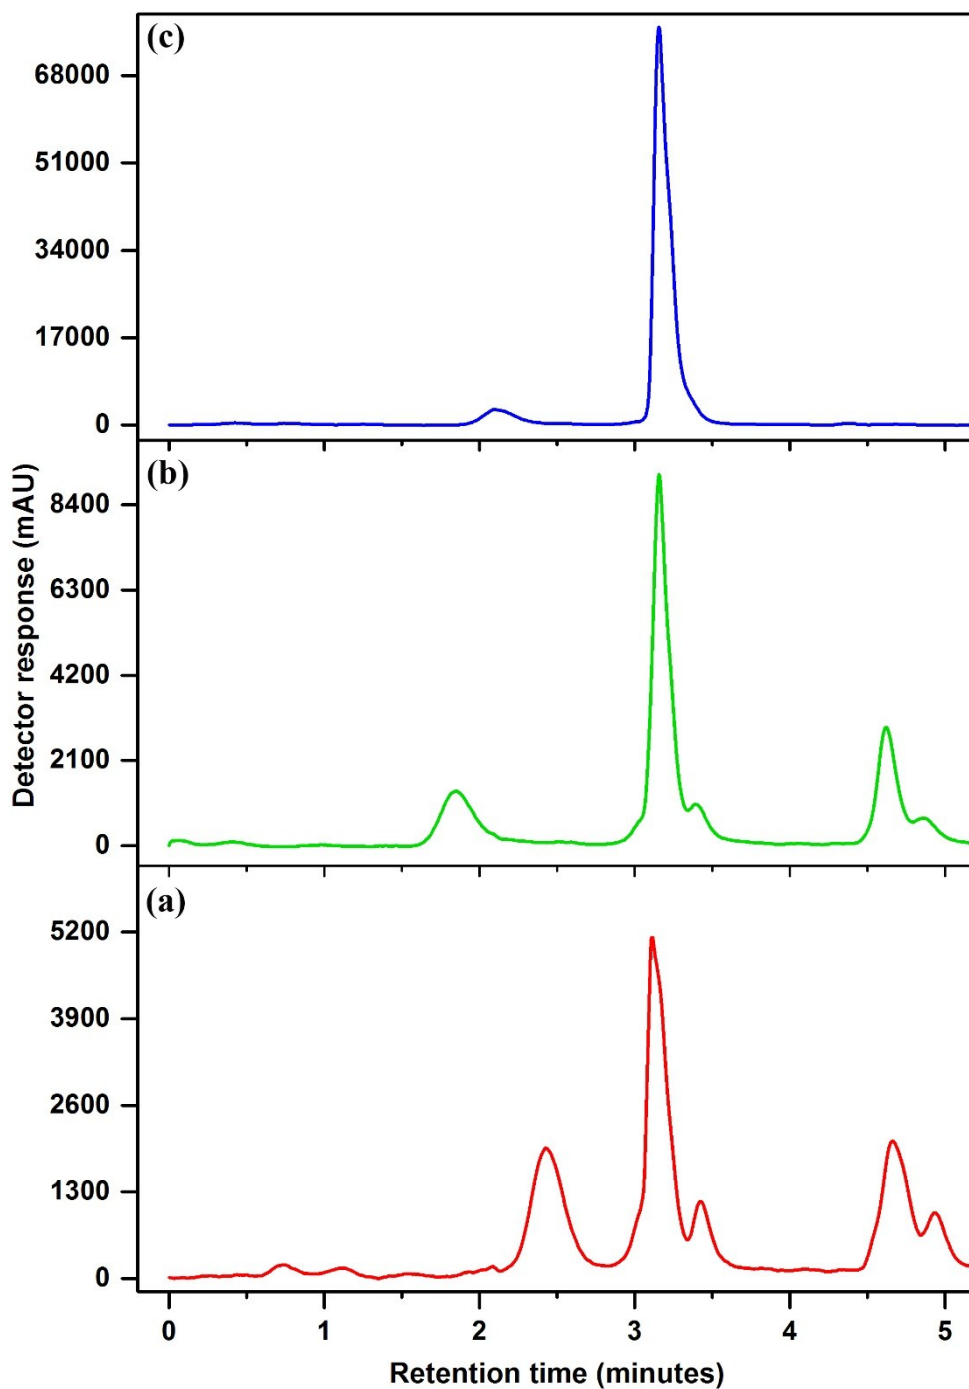

**Fig. S6.** Chromatogram of blank (a) spiked (b) and extracted from *Salvia officinalis* after MDMSPE (c) at  $200 \text{ ng mL}^{-1}$  for the extraction of chlorogenic acid with  $\text{CuO/ZnO@Fe}_3\text{O}_4$ -CNTs-NC under the optimum conditions.

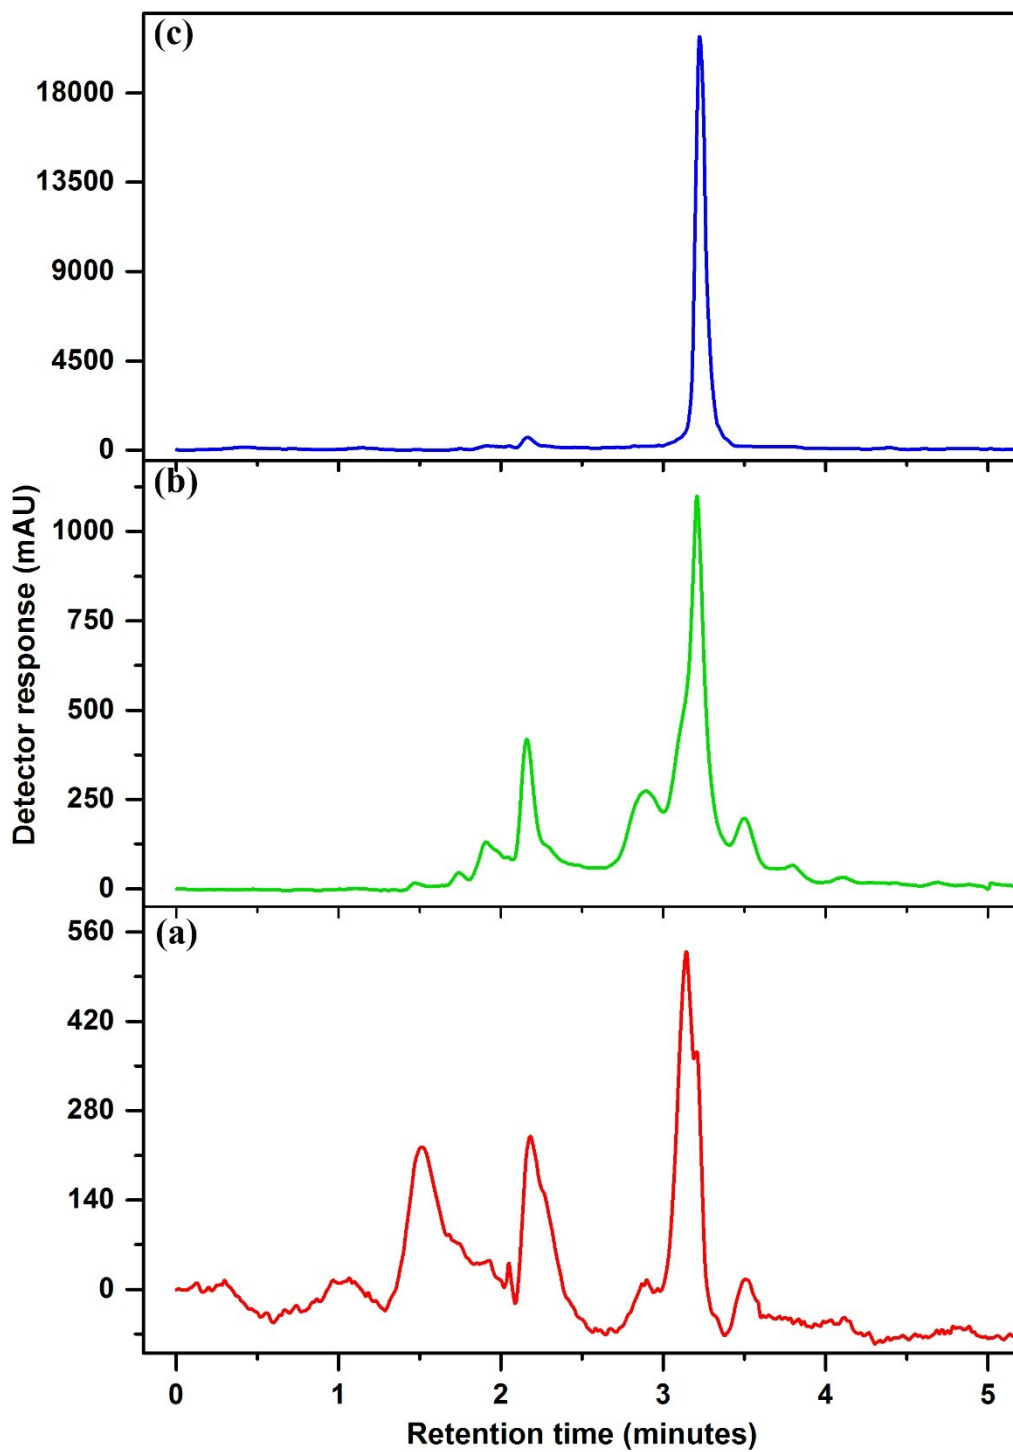

**Fig. S7.** Chromatogram of blank (a) spiked (b) and extracted from Broccoli (*Brassica oleracea*) after MDMSPE (c) at  $200 \text{ ng mL}^{-1}$  for the extraction of chlorogenic acid with  $\text{CuO/ZnO@Fe}_3\text{O}_4\text{-CNTs-NC}$  under the optimum conditions.



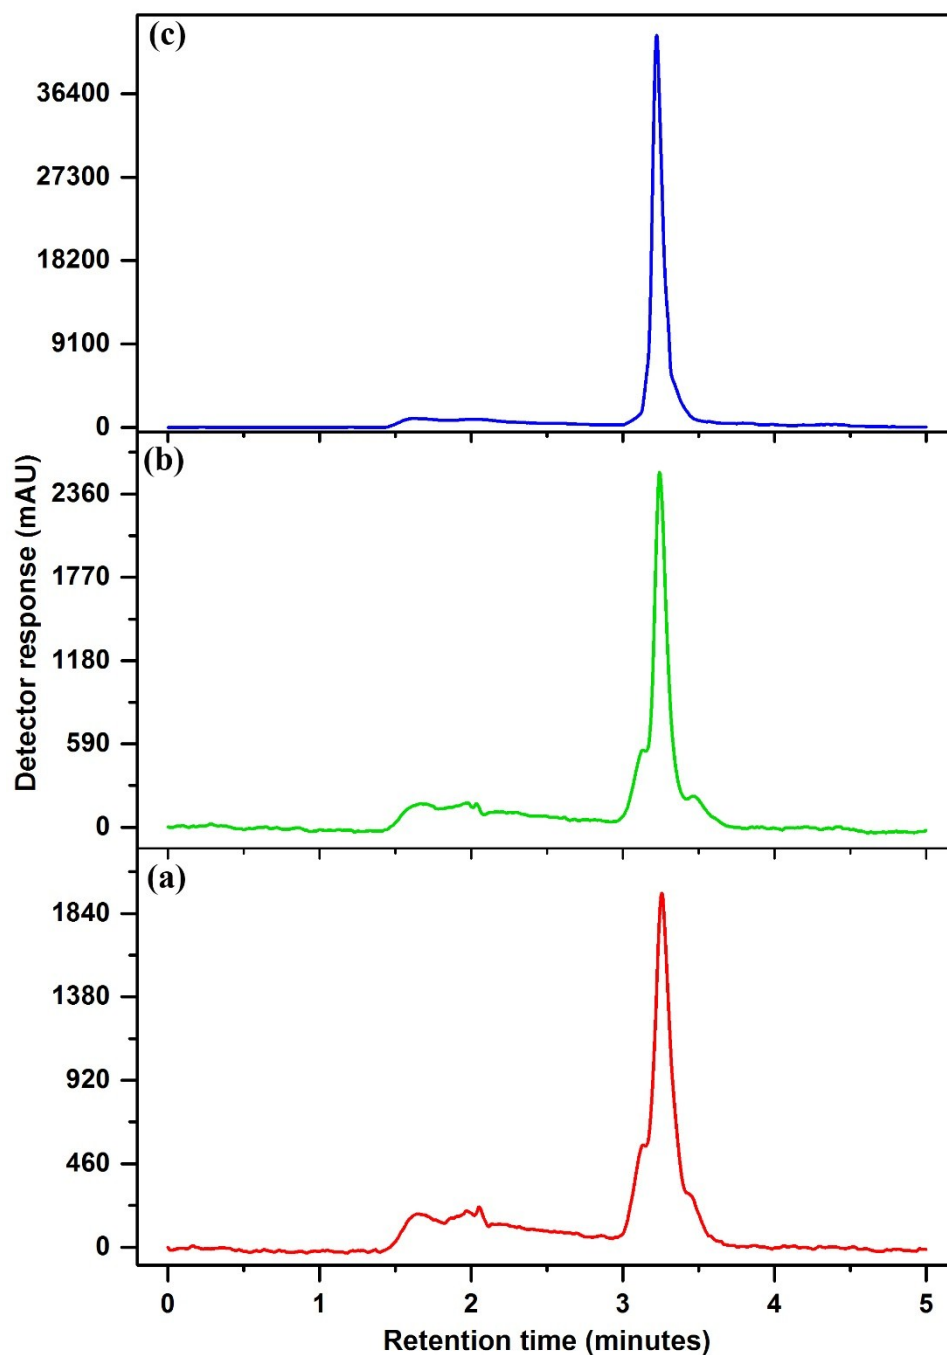

**Fig. S8.** Chromatogram of blank (a) spiked (b) and extracted from eggplants after MDMSPE (c) at  $200 \text{ ng mL}^{-1}$  for the extraction of chlorogenic acid with  $\text{CuO/ZnO@Fe}_3\text{O}_4\text{-CNTs-NC}$  under the optimum conditions.

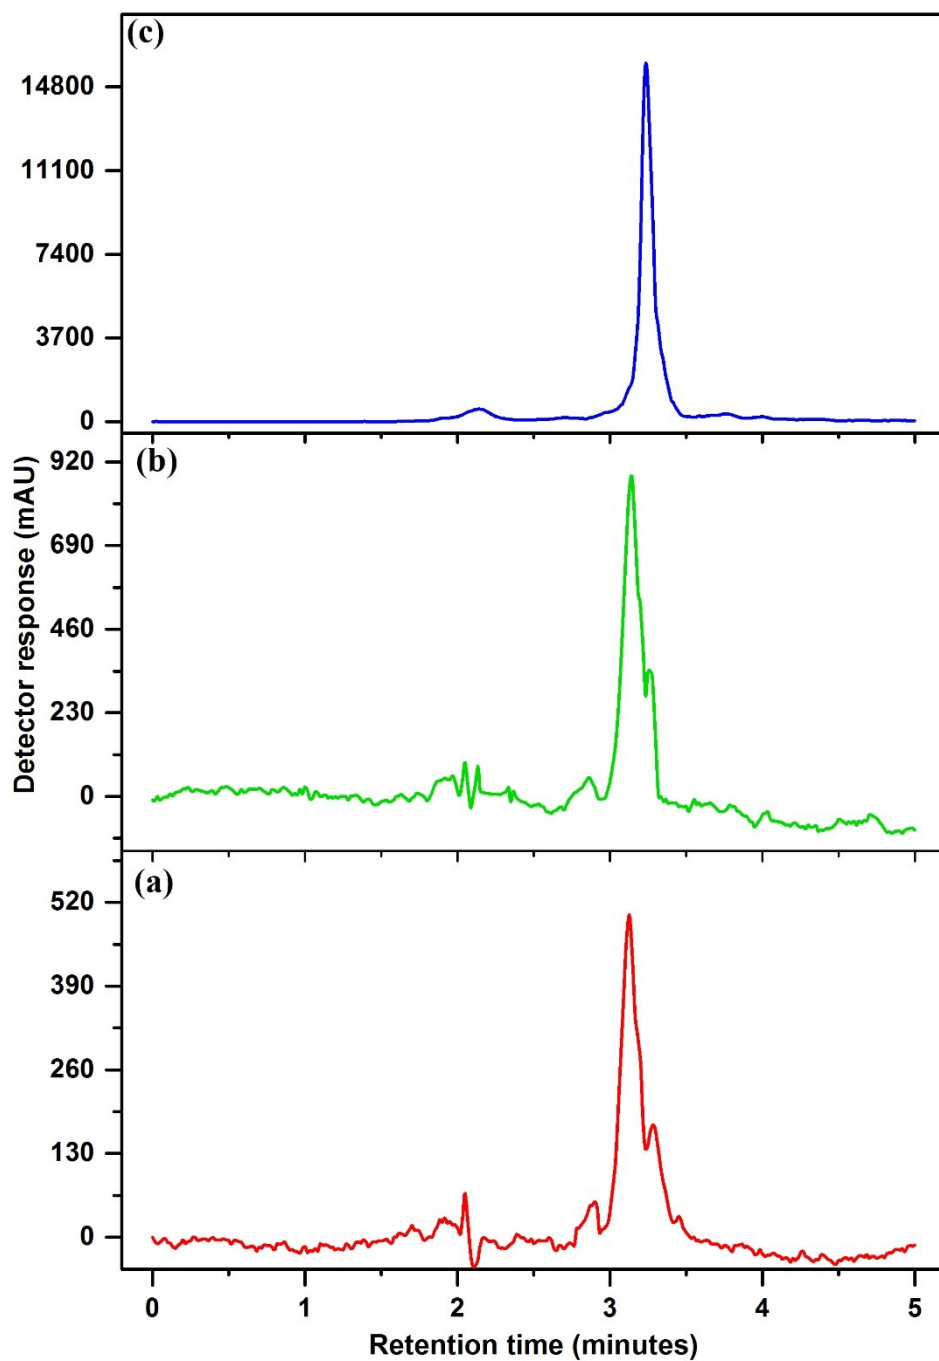

27

28 **Fig. S9.** Chromatogram of blank (a) spiked (b) and extracted from tomato after MDMSPE (c)  
29 at  $200 \text{ ng mL}^{-1}$  for the extraction of chlorogenic acid with  $\text{CuO/ZnO@Fe}_3\text{O}_4\text{-CNTs-NC}$  under  
30 the optimum conditions.

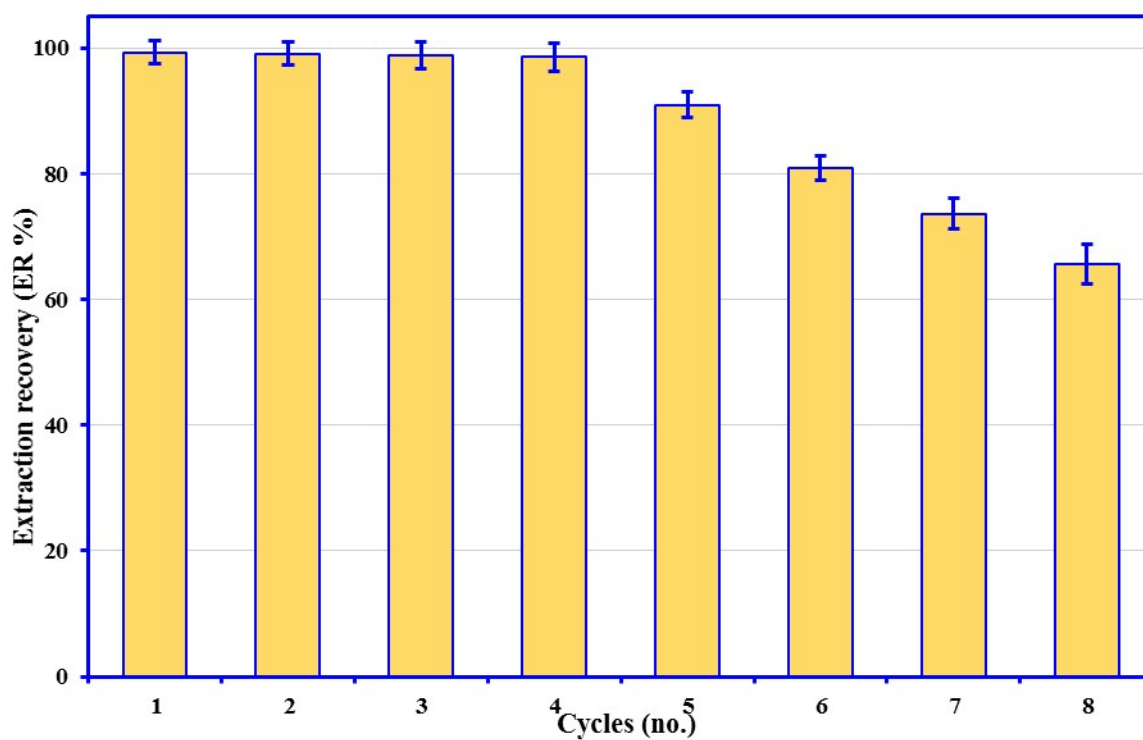

33

34 **Fig. S10.** Reusability of CuO/ZnO@Fe<sub>3</sub>O<sub>4</sub>-CNTs-NC for MDMSPE of chlorogenic acid  
35 under optimum conditions. The mean of three replicates was used as each extraction  
36 efficiency with error bar.

37 **2. Tables**

38 **Table. S1.** Experimental parameters and their levels used in screening by the PBD for the  
 39 extraction recovery of chlorogenic acid as the response in MDMSPE.

| Independent variables                | Unit | Level    |            |           |
|--------------------------------------|------|----------|------------|-----------|
|                                      |      | Low (-1) | Center (0) | High (+1) |
| (X <sub>1</sub> ) pH                 | -    | 3.5      | 6.0        | 8.5       |
| (X <sub>2</sub> ) Temperature        | °C   | 25       | 35         | 45        |
| (X <sub>3</sub> ) Eluent volume      | μL   | 100      | 200        | 300       |
| (X <sub>4</sub> ) Vortex time        | min  | 0.0      | 1.0        | 2.0       |
| (X <sub>5</sub> ) Sonication time    | min  | 1.0      | 3.0        | 5.0       |
| (X <sub>6</sub> ) Nanocomposite mass | mg   | 5.0      | 10.0       | 15.0      |
| (X <sub>7</sub> ) Desorption time    | min  | 2.0      | 3.5        | 5.0       |

  

| Run | Factors        |                |                |                |                |                |                | ER%              |
|-----|----------------|----------------|----------------|----------------|----------------|----------------|----------------|------------------|
|     | X <sub>1</sub> | X <sub>2</sub> | X <sub>3</sub> | X <sub>4</sub> | X <sub>5</sub> | X <sub>6</sub> | X <sub>7</sub> | Chlorogenic acid |
| 1   | 0              | 0              | 0              | 0              | 0              | 0              | 0              | 80.66            |
| 2   | -1             | 1              | 1              | -1             | -1             | 1              | -1             | 58.86            |
| 3   | 0              | 0              | 0              | 0              | 0              | 0              | 0              | 79.87            |
| 4   | 1              | -1             | -1             | -1             | -1             | 1              | 1              | 69.98            |
| 5   | -1             | -1             | 1              | 1              | -1             | -1             | 1              | 73.45            |
| 6   | -1             | 1              | -1             | -1             | 1              | -1             | 1              | 55.54            |
| 7   | -1             | -1             | -1             | 1              | 1              | 1              | -1             | 45.87            |
| 8   | 1              | 1              | 1              | 1              | 1              | 1              | 1              | 59.78            |
| 9   | 1              | 1              | -1             | 1              | -1             | -1             | -1             | 75.11            |
| 10  | 1              | -1             | 1              | -1             | 1              | -1             | -1             | 75.98            |

40

41 **Table. S2.** Analysis of variance of the fitted linear equation for recovery of chlorogenic acid.

| Source         | Degree of freedom | Sum of squares | Mean square | F-value | P-value  |
|----------------|-------------------|----------------|-------------|---------|----------|
| Model          | 14                | 8483.26        | 605.95      | 160.21  | < 0.0001 |
| A              | 1                 | 47.73          | 47.73       | 12.62   | 0.0164   |
| B              | 1                 | 2093.76        | 2093.76     | 553.57  | < 0.0001 |
| C              | 1                 | 580.48         | 580.48      | 153.47  | < 0.0001 |
| D              | 1                 | 753.50         | 753.50      | 199.22  | < 0.0001 |
| AB             | 1                 | 526.94         | 526.94      | 139.32  | < 0.0001 |
| AC             | 1                 | 645.55         | 645.55      | 170.68  | < 0.0001 |
| AD             | 1                 | 520.82         | 520.82      | 137.70  | < 0.0001 |
| BC             | 1                 | 0.28           | 0.28        | 0.07    | 0.7955   |
| BD             | 1                 | 531.80         | 531.80      | 140.60  | < 0.0001 |
| CD             | 1                 | 22.25          | 22.25       | 5.88    | 0.0597   |
| A <sup>2</sup> | 1                 | 2779.85        | 2779.85     | 734.97  | < 0.0001 |
| B <sup>2</sup> | 1                 | 1170.39        | 1170.39     | 309.44  | < 0.0001 |
| C <sup>2</sup> | 1                 | 340.86         | 340.86      | 90.12   | 0.0002   |
| D <sup>2</sup> | 1                 | 1137.16        | 1137.16     | 300.66  | < 0.0001 |
| Residual       | 5                 | 18.91          | 3.78        |         |          |
| Lack of Fit    | 2                 | 12.23          | 6.11        | 2.74    | 0.2102   |
| Pure Error     | 3                 | 6.69           | 2.23        |         |          |
| Corr. Total    | 19                | 8502.17        |             |         |          |

42

43 **Table. S3.** Analytical parameters of CuO/ZnO@Fe<sub>3</sub>O<sub>4</sub>-CNTs-NC as the MDMSPE sorbent  
 44 for HPLC-UV determination of chlorogenic acid.

| Quantitative analysis                                 | Values        |
|-------------------------------------------------------|---------------|
| Sample volume (mL)                                    | 15.0          |
| Extraction solvent (mL)                               | 0.250         |
| Linear range (ng mL <sup>-1</sup> )                   | 0.25-4300     |
| Coefficients of determination (R <sup>2</sup> )       | >0.9893       |
| Limit of detections (LODs) (ng mL <sup>-1</sup> )     | 0.034-0.061   |
| limit of quantification (LOQs) (ng mL <sup>-1</sup> ) | 0.114-0.202   |
| Enrichment factor (EF)                                | 102.43-123.76 |
| Preconcentration factor (PF)                          | 60.0          |
| Repeatability (RSD, %)                                | 1.42-6.06     |
| Reproducibility (RSD, %)                              | 2.18-8.39     |

45

46

47 **Table S4.** Parameters of Langmuir and Freundlich isotherm models for the sorption of CGA onto both sorbents.

| <b>Isotherm</b>                                 | <b>Freundlich isotherm</b>             |                          |                      | <b>Langmuir isotherm</b>                    |                          |                      |                      |
|-------------------------------------------------|----------------------------------------|--------------------------|----------------------|---------------------------------------------|--------------------------|----------------------|----------------------|
| Equation                                        | $\log q_e = \log K_F + (1/n) \log C_e$ |                          |                      | $C_e/q_e = (1/Q_{\max} K_L) + C_e/Q_{\max}$ |                          |                      |                      |
|                                                 |                                        |                          |                      | $R_L = (1)/(1 + K_L C_0)$                   |                          |                      |                      |
| Plot                                            | $\log q_e$ vs. $\log C_e$              |                          |                      | $C_e/q_e$ vs. $C_e$                         |                          |                      |                      |
| <b>Parameters</b>                               | <b>1/n</b>                             | <b>K<sub>F</sub></b>     | <b>R<sup>2</sup></b> | <b>Q<sub>max</sub></b>                      | <b>K<sub>L</sub></b>     | <b>R<sup>2</sup></b> | <b>R<sub>L</sub></b> |
| <b>Unit</b>                                     | -                                      | <b>L mg<sup>-1</sup></b> | -                    | <b>mg g<sup>-1</sup></b>                    | <b>L mg<sup>-1</sup></b> | -                    | -                    |
| CuO/ZnO@Fe <sub>3</sub> O <sub>4</sub> -CNTs-NC | 0.643                                  | 3.712                    | 0.961                | 65.38                                       | 0.586                    | 0.989                | 0.041-0.363          |
| CuO/ZnO@Fe <sub>3</sub> O <sub>4</sub> -NC      | 0.278                                  | 2.655                    | 0.928                | 22.55                                       | 0.661                    | 0.975                | 0.036-0.335          |

48

49
